# Supplementary material for: Host–Microbiome Archetypes Differentiate Infection from Pathogen Carriage in the Human Lower Airway
Source: Research Square preprint supplement (doi:10.21203/rs.3.rs-8171822/v1), 2025-12-01
Supplement: Supplementary file 4 [file 5cc70f09fca81da79094cb0e.xlsx]

## Sheet: fig1
pathogen	LRTI	IPC	total_LRTI	total_IPC
Adenovirus	18	4	207	70
Beta hemolytic Streptococcus*	5	0	207	70
Bocavirus*	8	0	207	70
Bordetella spp	1	1	207	70
Coronavirus	12	4	207	70
Cytomegalovirus*	2	0	207	70
Escherichia coli	7	1	207	70
Fusobacterium nucleatum	1	2	207	70
Haemophilus influenzae	62	12	207	70
Human metapneumovirus*	14	0	207	70
Influenza virus	6	3	207	70
Klebsiella pneumoniae*	3	0	207	70
Moraxella catarrhalis	58	12	207	70
Mycoplasma pneumoniae*	2	0	207	70
Parainfluenza virus	18	5	207	70
Parechovirus	2	1	207	70
Pseudomonas aeruginosa	4	7	207	70
Respiratory syncytial virus	109	9	207	70
Rhinovirus	45	23	207	70
Serratia marcescens	1	1	207	70
Staphylococcus aureus	18	10	207	70
Streptococcus pneumoniae	25	5	207	70
Streptococcus viridans*	7	0	207	70

## Sheet: fig2a
Patient	group	shannon_index
P1	LRTI	0.269948
P2	LRTI	0.695002
P3	LRTI	0.170374
P4	LRTI	2.93384
P5	LRTI	0.893575
P6	LRTI	0.803197
P7	LRTI	0.107404
P8	LRTI	0.107892
P9	LRTI	2.31535
P10	LRTI	0.0558052
P11	LRTI	0
P12	LRTI	2.54281
P13	LRTI	2.26576
P14	LRTI	1.74043
P15	LRTI	0.194535
P16	LRTI	0.688042
P17	IPC	3.21162
P18	CTRL	1.49658
P19	CTRL	1.52162
P20	IPC	2.13616
P21	LRTI	2.09446
P22	IPC	0.596463
P23	LRTI	1.62831
P24	LRTI	1.64737
P25	CTRL	1.20898
P26	IPC	0.0933946
P27	LRTI	1.55854
P28	IPC	0.72065
P29	LRTI	0.40431
P30	LRTI	0.704253
P31	LRTI	3.21796
P32	LRTI	0.280342
P33	LRTI	0.0715255
P34	LRTI	0.504498
P35	IPC	0.457619
P36	LRTI	0.565505
P37	LRTI	0.923268
P38	LRTI	0.0401925
P39	LRTI	0.849447
P40	LRTI	0.223724
P41	LRTI	0.0150788
P42	LRTI	0.148243
P43	IPC	0.186751
P44	LRTI	0.602704
P45	LRTI	0.617476
P46	LRTI	0.752965
P47	LRTI	0.200881
P48	IPC	2.08207
P49	LRTI	0.641864
P50	LRTI	0.551235
P51	LRTI	1.72508
P52	LRTI	0.673641
P53	IPC	0.152472
P54	LRTI	0.339566
P55	LRTI	0.699653
P56	LRTI	0
P57	LRTI	0.607073
P58	LRTI	0.683524
P59	LRTI	0.0159169
P60	LRTI	0.300283
P61	LRTI	1.48446
P62	IPC	2.16797
P63	LRTI	0.0399907
P64	IPC	0.978663
P65	LRTI	0
P66	LRTI	0.0513795
P67	LRTI	0.625125
P68	IPC	1.87129
P69	LRTI	0.0585931
P70	LRTI	0.867592
P71	LRTI	1.122
P72	LRTI	1.32237
P73	LRTI	0.562984
P74	IPC	0.154604
P75	LRTI	1.28242
P76	LRTI	0.174819
P77	LRTI	0.0231643
P78	LRTI	0.758034
P79	IPC	2.15539
P80	IPC	2.23372
P81	LRTI	0.820332
P82	CTRL	2.11517
P83	IPC	2.77637
P84	LRTI	0.00540521
P85	LRTI	1.86921
P86	LRTI	0.0183315
P87	LRTI	0.00881508
P88	LRTI	0.00662801
P89	IPC	2.59559
P90	LRTI	0.759707
P91	CTRL	2.55789
P92	IPC	0.237192
P93	CTRL	1.4826
P94	IPC	2.92354
P95	LRTI	0
P96	CTRL	2.73563
P97	CTRL	1.52672
P98	IPC	0.00282945
P99	IPC	0.00125
P100	CTRL	1.25208
P101	CTRL	2.28917
P102	LRTI	0.264222
P103	LRTI	0.527627
P104	LRTI	0.440202
P105	LRTI	0.647213
P106	IPC	2.19429
P107	CTRL	2.31323
P108	LRTI	0.924031
P109	LRTI	0.414986
P110	CTRL	2.46797
P111	IPC	2.18571
P112	CTRL	1.02829
P113	LRTI	2.47146
P114	CTRL	1.62612
P115	IPC	2.47173
P116	LRTI	0.314435
P117	CTRL	1.65624
P118	LRTI	0.133762
P119	LRTI	0.276147
P120	LRTI	0.00116935
P121	LRTI	0.19714
P122	LRTI	1.16513
P123	LRTI	0.593568
P124	LRTI	0.114403
P125	LRTI	0.000735042
P126	LRTI	0.0629059
P127	LRTI	0.702131
P128	LRTI	1.50523
P129	LRTI	0.380784
P130	LRTI	0.262089
P131	LRTI	0.322809
P132	LRTI	0.417021
P133	LRTI	0.190805
P134	LRTI	0.752177
P135	LRTI	0.0325297
P136	LRTI	0.27179
P137	LRTI	0.49968
P138	LRTI	0.0958223
P139	LRTI	0.014189
P140	IPC	0.00168476
P141	LRTI	0.341739
P142	CTRL	2.15622
P143	IPC	1.54024
P144	IPC	0.326786
P145	IPC	1.06169
P146	CTRL	1.11799
P147	LRTI	1.11731
P148	LRTI	0.220829
P149	IPC	2.07075
P150	CTRL	2.1613
P151	LRTI	0.0219569
P152	LRTI	0.0277336
P153	LRTI	0.0143947
P154	LRTI	0.546121
P155	LRTI	2.6508
P156	CTRL	0
P157	LRTI	0.519768
P158	LRTI	0.019127
P159	LRTI	2.29541
P160	LRTI	0.551866
P161	LRTI	0.00322966
P162	LRTI	0.717086
P163	LRTI	0.352101
P164	LRTI	0.00218948
P165	LRTI	1.82293
P166	LRTI	0.249417
P167	LRTI	2.04546
P168	CTRL	0.361862
P169	LRTI	0.0273178
P170	LRTI	0.0901533
P171	LRTI	1.46128
P172	CTRL	2.11282
P173	LRTI	0.50446
P174	LRTI	0.321276
P175	LRTI	0.0289684
P176	LRTI	0.885259
P177	LRTI	0.811748
P178	LRTI	0.293522
P179	LRTI	0.169095
P180	LRTI	0.00219058
P181	LRTI	0.110309
P182	IPC	2.64078
P183	IPC	2.3337
P184	IPC	2.13742
P185	IPC	0.0395856
P186	IPC	1.91183
P187	IPC	1.92653
P188	LRTI	2.33276
P189	LRTI	0.222737
P190	CTRL	2.10846
P191	IPC	1.17766
P192	IPC	0.389397
P193	CTRL	1.33408
P194	LRTI	0.480692
P195	LRTI	2.36589
P196	CTRL	0.376053
P197	LRTI	0.10936
P198	IPC	3.82174
P199	LRTI	0.341191
P200	LRTI	0
P201	CTRL	3.87462
P202	CTRL	1.89464
P203	CTRL	3.69986
P204	IPC	0.000920886
P205	IPC	0.0896614
P206	IPC	2.46651
P207	LRTI	1.69044
P208	LRTI	3.34173
P209	LRTI	0.0596102
P210	IPC	0.529279
P211	CTRL	1.79603
P212	IPC	2.13925
P213	IPC	2.91433
P214	IPC	2.56414
P215	IPC	3.49463
P216	IPC	1.8711
P217	CTRL	2.16947
P218	CTRL	2.91169
P219	IPC	2.90875
P220	LRTI	0.0327059
P221	LRTI	0.0570852
P222	LRTI	0.0465693
P223	LRTI	0
P224	LRTI	0.115932
P225	LRTI	0.0443256
P226	LRTI	0.0803469
P227	LRTI	0.25497
P228	LRTI	0.65996
P229	LRTI	0
P230	LRTI	0.285767
P231	LRTI	0
P232	LRTI	1.12973
P233	LRTI	0.752199
P234	LRTI	1.79362
P235	LRTI	0.143126
P236	LRTI	0.291427
P237	LRTI	0.986429
P238	LRTI	0.0221519
P239	LRTI	0.150256
P240	LRTI	0.00114914
P241	LRTI	0.0345163
P242	LRTI	0.0583401
P243	LRTI	0.421215
P244	LRTI	1.60688
P245	LRTI	2.07451
P246	LRTI	1.22346
P247	LRTI	2.01188
P248	LRTI	0.27777
P249	LRTI	0.0546714
P250	LRTI	0.0185331
P251	LRTI	0.335372
P252	LRTI	0.609666
P253	LRTI	0.0158128
P254	LRTI	0.00924401
P255	LRTI	0.11496
P256	CTRL	2.93002
P257	IPC	1.21527
P258	LRTI	0.348962
P259	LRTI	0.351824
P260	CTRL	2.73413
P261	IPC	1.00505
P262	LRTI	0.0150458
P263	LRTI	0.692464
P264	LRTI	0.39536
P265	CTRL	1.80043
P266	IPC	0.198787
P267	LRTI	0.643594
P268	CTRL	1.32385
P269	IPC	0.917774
P270	LRTI	0.700549
P271	LRTI	0.399457
P272	IPC	1.91194
P273	IPC	3.26916
P274	LRTI	2.13041
P275	LRTI	0.0274285
P276	LRTI	0.201115
P277	IPC	2.25023
P278	IPC	2.2958
P279	IPC	2.31408
P280	CTRL	2.35941
P281	LRTI	1.23142
P282	LRTI	0.63976
P283	IPC	2.05906
P284	IPC	0.174637
P285	IPC	1.06294
P286	CTRL	3.99878
P287	IPC	0.165601
P288	LRTI	0.385961
P289	IPC	0.118927
P290	LRTI	0.952316
P291	LRTI	2.88948
P292	IPC	2.45617
P293	LRTI	0.428197
P294	IPC	0.275008
P295	CTRL	1.74486
P296	LRTI	0.00960821
P297	IPC	1.83063
P298	LRTI	1.5297
P299	CTRL	2.82614
P300	LRTI	0.025315
P301	CTRL	1.76141
P302	LRTI	0.155357
P303	CTRL	1.83867
P304	LRTI	1.19255
P305	IPC	1.52534
P306	IPC	1.61536
P307	CTRL	0.140754
P308	IPC	0.0949366
P309	CTRL	1.70609
P310	LRTI	1.73045
P311	CTRL	1.3739
P312	CTRL	1.59174
P313	LRTI	1.23791
P314	LRTI	0.0430451
P315	LRTI	1.09793
P316	CTRL	0.551566
P317	LRTI	2.10606
P318	CTRL	2.0626
P319	CTRL	1.73301
P320	CTRL	1.29763
P321	LRTI	0.986783
P322	LRTI	0.932555
P323	IPC	2.3553
P324	LRTI	0.769102
P325	IPC	2.82562
P326	CTRL	3.13769

## Sheet: fig2b
Patient	group	log( # of species)
P1	LRTI	1.38629
P2	LRTI	1.60944
P3	LRTI	2.99573
P4	LRTI	5.18739
P5	LRTI	1.60944
P6	LRTI	2.56495
P7	LRTI	1.38629
P8	LRTI	1.09861
P9	LRTI	4.62497
P10	LRTI	2.63906
P11	LRTI	0
P12	LRTI	3.80666
P13	LRTI	3.55535
P14	LRTI	3.49651
P15	LRTI	3.04452
P16	LRTI	4.91998
P17	IPC	5.0876
P18	CTRL	2.70805
P19	CTRL	3.82864
P20	IPC	4.47734
P21	LRTI	3.55535
P22	IPC	1.60944
P23	LRTI	4.06044
P24	LRTI	3.71357
P25	CTRL	3.82864
P26	IPC	1.38629
P27	LRTI	2.3979
P28	IPC	3.66356
P29	LRTI	2.30259
P30	LRTI	1.38629
P31	LRTI	5.25227
P32	LRTI	1.94591
P33	LRTI	2.07944
P34	LRTI	3.29584
P35	IPC	2.30259
P36	LRTI	1.94591
P37	LRTI	1.94591
P38	LRTI	1.09861
P39	LRTI	2.63906
P40	LRTI	2.70805
P41	LRTI	1.38629
P42	LRTI	3.7612
P43	IPC	2.3979
P44	LRTI	2.07944
P45	LRTI	1.94591
P46	LRTI	1.94591
P47	LRTI	1.60944
P48	IPC	4.33073
P49	LRTI	1.38629
P50	LRTI	1.79176
P51	LRTI	2.3979
P52	LRTI	1.60944
P53	IPC	1.94591
P54	LRTI	2.89037
P55	LRTI	1.60944
P56	LRTI	0
P57	LRTI	0.693147
P58	LRTI	0.693147
P59	LRTI	1.09861
P60	LRTI	2.70805
P61	LRTI	2.3979
P62	IPC	4.20469
P63	LRTI	1.60944
P64	IPC	3.04452
P65	LRTI	0.693147
P66	LRTI	2.30259
P67	LRTI	2.63906
P68	IPC	3.46574
P69	LRTI	2.48491
P70	LRTI	2.89037
P71	LRTI	2.30259
P72	LRTI	2.63906
P73	LRTI	1.79176
P74	IPC	0.693147
P75	LRTI	2.3979
P76	LRTI	1.38629
P77	LRTI	2.07944
P78	LRTI	2.56495
P79	IPC	3.73767
P80	IPC	4.18965
P81	LRTI	2.94444
P82	CTRL	4.04305
P83	IPC	4.44265
P84	LRTI	1.09861
P85	LRTI	3.2581
P86	LRTI	1.38629
P87	LRTI	0.693147
P88	LRTI	1.09861
P89	IPC	4.00733
P90	LRTI	1.38629
P91	CTRL	3.89182
P92	IPC	2.07944
P93	CTRL	1.79176
P94	IPC	4.15888
P95	LRTI	0
P96	CTRL	4.02535
P97	CTRL	3.04452
P98	IPC	1.94591
P99	IPC	1.09861
P100	CTRL	2.70805
P101	CTRL	3.21888
P102	LRTI	1.09861
P103	LRTI	1.09861
P104	LRTI	1.79176
P105	LRTI	1.38629
P106	IPC	3.89182
P107	CTRL	3.95124
P108	LRTI	3.71357
P109	LRTI	1.60944
P110	CTRL	4.58497
P111	IPC	3.43399
P112	CTRL	2.94444
P113	LRTI	3.93183
P114	CTRL	2.3979
P115	IPC	3.78419
P116	LRTI	0.693147
P117	CTRL	2.56495
P118	LRTI	1.79176
P119	LRTI	1.38629
P120	LRTI	0.693147
P121	LRTI	0.693147
P122	LRTI	2.3979
P123	LRTI	1.79176
P124	LRTI	1.60944
P125	LRTI	0.693147
P126	LRTI	1.38629
P127	LRTI	1.94591
P128	LRTI	2.3979
P129	LRTI	1.60944
P130	LRTI	1.79176
P131	LRTI	1.94591
P132	LRTI	1.38629
P133	LRTI	1.79176
P134	LRTI	1.60944
P135	LRTI	1.09861
P136	LRTI	1.79176
P137	LRTI	0.693147
P138	LRTI	2.3979
P139	LRTI	1.60944
P140	IPC	0.693147
P141	LRTI	0.693147
P142	CTRL	3.43399
P143	IPC	2.89037
P144	IPC	2.83321
P145	IPC	4.81218
P146	CTRL	2.70805
P147	LRTI	2.19722
P148	LRTI	1.38629
P149	IPC	2.83321
P150	CTRL	3.91202
P151	LRTI	1.79176
P152	LRTI	1.09861
P153	LRTI	0.693147
P154	LRTI	1.38629
P155	LRTI	4.83628
P156	CTRL	0
P157	LRTI	1.79176
P158	LRTI	1.60944
P159	LRTI	3.63759
P160	LRTI	2.30259
P161	LRTI	1.38629
P162	LRTI	1.94591
P163	LRTI	1.79176
P164	LRTI	1.38629
P165	LRTI	2.77259
P166	LRTI	2.07944
P167	LRTI	3.13549
P168	CTRL	1.09861
P169	LRTI	1.38629
P170	LRTI	1.38629
P171	LRTI	2.07944
P172	CTRL	3.17805
P173	LRTI	1.60944
P174	LRTI	1.94591
P175	LRTI	1.38629
P176	LRTI	1.94591
P177	LRTI	2.3979
P178	LRTI	2.19722
P179	LRTI	1.79176
P180	LRTI	0.693147
P181	LRTI	0.693147
P182	IPC	4.23411
P183	IPC	3.89182
P184	IPC	3.17805
P185	IPC	1.60944
P186	IPC	3.89182
P187	IPC	4.20469
P188	LRTI	3.98898
P189	LRTI	1.79176
P190	CTRL	3.3673
P191	IPC	3.63759
P192	IPC	2.30259
P193	CTRL	1.60944
P194	LRTI	0.693147
P195	LRTI	3.17805
P196	CTRL	1.09861
P197	LRTI	1.79176
P198	IPC	4.35671
P199	LRTI	2.94444
P200	LRTI	0.693147
P201	CTRL	4.68213
P202	CTRL	4.36945
P203	CTRL	4.26268
P204	IPC	1.38629
P205	IPC	2.30259
P206	IPC	4.69135
P207	LRTI	3.21888
P208	LRTI	5.24702
P209	LRTI	2.30259
P210	IPC	4.39445
P211	CTRL	3.80666
P212	IPC	4.09434
P213	IPC	4.81218
P214	IPC	3.58352
P215	IPC	5.43808
P216	IPC	4.17439
P217	CTRL	4.66344
P218	CTRL	5.49717
P219	IPC	4.2485
P220	LRTI	1.38629
P221	LRTI	1.09861
P222	LRTI	1.38629
P223	LRTI	0.693147
P224	LRTI	1.38629
P225	LRTI	1.09861
P226	LRTI	1.79176
P227	LRTI	2.56495
P228	LRTI	0.693147
P229	LRTI	0
P230	LRTI	1.79176
P231	LRTI	0
P232	LRTI	1.38629
P233	LRTI	2.19722
P234	LRTI	3.68888
P235	LRTI	2.56495
P236	LRTI	1.09861
P237	LRTI	3.09104
P238	LRTI	1.94591
P239	LRTI	1.38629
P240	LRTI	0.693147
P241	LRTI	1.94591
P242	LRTI	2.07944
P243	LRTI	1.38629
P244	LRTI	2.63906
P245	LRTI	3.43399
P246	LRTI	1.94591
P247	LRTI	3.04452
P248	LRTI	2.99573
P249	LRTI	1.38629
P250	LRTI	1.38629
P251	LRTI	1.94591
P252	LRTI	1.60944
P253	LRTI	1.09861
P254	LRTI	1.60944
P255	LRTI	2.07944
P256	CTRL	4.63473
P257	IPC	4.30407
P258	LRTI	1.79176
P259	LRTI	3.13549
P260	CTRL	4.06044
P261	IPC	2.89037
P262	LRTI	1.60944
P263	LRTI	2.63906
P264	LRTI	1.79176
P265	CTRL	3.85015
P266	IPC	2.19722
P267	LRTI	2.83321
P268	CTRL	4.02535
P269	IPC	3.63759
P270	LRTI	2.07944
P271	LRTI	1.79176
P272	IPC	3.80666
P273	IPC	4.43082
P274	LRTI	3.97029
P275	LRTI	2.89037
P276	LRTI	2.19722
P277	IPC	4.55388
P278	IPC	3.61092
P279	IPC	3.46574
P280	CTRL	4.00733
P281	LRTI	3.2581
P282	LRTI	1.38629
P283	IPC	3.49651
P284	IPC	2.07944
P285	IPC	1.60944
P286	CTRL	4.39445
P287	IPC	1.38629
P288	LRTI	2.63906
P289	IPC	2.89037
P290	LRTI	3.61092
P291	LRTI	4.78749
P292	IPC	4.52179
P293	LRTI	2.56495
P294	IPC	2.19722
P295	CTRL	2.19722
P296	LRTI	1.38629
P297	IPC	3.21888
P298	LRTI	2.70805
P299	CTRL	4.49981
P300	LRTI	1.38629
P301	CTRL	3.52636
P302	LRTI	2.83321
P303	CTRL	2.77259
P304	LRTI	3.46574
P305	IPC	2.89037
P306	IPC	2.3979
P307	CTRL	2.07944
P308	IPC	2.30259
P309	CTRL	2.30259
P310	LRTI	3.2581
P311	CTRL	2.19722
P312	CTRL	2.3979
P313	LRTI	2.99573
P314	LRTI	2.07944
P315	LRTI	2.3979
P316	CTRL	3.3673
P317	LRTI	3.91202
P318	CTRL	3.21888
P319	CTRL	2.30259
P320	CTRL	2.07944
P321	LRTI	1.94591
P322	LRTI	4.84419
P323	IPC	4.2485
P324	LRTI	4.2485
P325	IPC	5.80513
P326	CTRL	4.63473

## Sheet: fig2c
Patient	group	PC1	PC2
P1	LRTI	-0.426139	-0.212931
P2	LRTI	-0.371085	-0.234484
P3	LRTI	-0.101158	0.0528765
P4	LRTI	0.0898029	-0.00208631
P5	LRTI	-0.453847	0.0200934
P6	LRTI	-0.21062	-0.103391
P7	LRTI	-0.356767	0.109298
P8	LRTI	-0.483661	-0.207833
P9	LRTI	0.171685	-0.113448
P10	LRTI	-0.257157	-0.136799
P11	LRTI	-0.109937	0.461675
P12	LRTI	0.350726	-0.246534
P13	LRTI	0.0990314	-0.0386333
P14	LRTI	-0.0811971	0.070227
P15	LRTI	0.117084	0.13445
P16	LRTI	0.0776517	-0.0141499
P17	IPC	0.235136	-0.0844158
P18	CTRL	0.115791	0.0929311
P19	CTRL	0.273165	-0.166779
P20	IPC	0.163419	-0.00386708
P21	LRTI	0.236133	-0.0353612
P22	IPC	0.0127024	0.168638
P23	LRTI	0.319967	-0.276154
P24	LRTI	0.338544	-0.162968
P25	CTRL	0.25104	-0.0547295
P26	IPC	0.118185	-0.0352547
P27	LRTI	0.000489776	0.0552531
P28	IPC	0.203983	-0.0823163
P29	LRTI	-0.282665	-0.201431
P30	LRTI	-0.0249983	0.50002
P31	LRTI	0.123838	0.0602871
P32	LRTI	-0.309897	0.00148595
P33	LRTI	0.139545	0.121158
P34	LRTI	-0.156067	-0.0736259
P35	IPC	-0.379526	0.0510904
P36	LRTI	-0.353289	-0.145211
P37	LRTI	-0.404364	0.0621415
P38	LRTI	-0.452834	-0.264546
P39	LRTI	-0.174429	-0.26501
P40	LRTI	-0.0415898	0.229193
P41	LRTI	-0.464563	-0.193497
P42	LRTI	-0.104949	-0.0698988
P43	IPC	-0.0933284	0.164556
P44	LRTI	-0.331598	-0.012711
P45	LRTI	-0.321102	-0.217293
P46	LRTI	-0.307009	-0.0628746
P47	LRTI	0.111039	0.0845521
P48	IPC	0.241786	-0.127714
P49	LRTI	0.0646993	0.00663914
P50	LRTI	-0.411227	-0.156423
P51	LRTI	0.166858	0.00950199
P52	LRTI	-0.105411	0.263418
P53	IPC	0.00337372	0.323523
P54	LRTI	0.0560471	0.131387
P55	LRTI	-0.411896	-0.218138
P56	LRTI	0.0489111	-0.0190371
P57	LRTI	-0.40759	0.17261
P58	LRTI	-0.458242	0.132012
P59	LRTI	-0.514405	-0.0242467
P60	LRTI	-0.158364	0.0596305
P61	LRTI	0.13878	-0.0215476
P62	IPC	0.243956	-0.216311
P63	LRTI	-0.38398	-0.167841
P64	IPC	0.113927	0.0919639
P65	LRTI	-0.0499884	0.0482583
P66	LRTI	0.10443	0.0770629
P67	LRTI	0.138619	-0.0215532
P68	IPC	0.26291	-0.0909901
P69	LRTI	-0.322444	-0.165418
P70	LRTI	-0.0993845	-0.154995
P71	LRTI	0.0732228	0.205663
P72	LRTI	-0.0364748	0.159352
P73	LRTI	-0.39719	0.160053
P74	IPC	0.137251	0.129161
P75	LRTI	0.119181	-0.091112
P76	LRTI	0.0315615	-0.0471471
P77	LRTI	-0.20676	0.182316
P78	LRTI	-0.000995758	0.287291
P79	IPC	0.282197	-0.166377
P80	IPC	0.250753	-0.133577
P81	LRTI	0.0988216	0.179738
P82	CTRL	0.350659	-0.283749
P83	IPC	0.0671056	0.00279509
P84	LRTI	0.146719	0.165725
P85	LRTI	0.26193	-0.152354
P86	LRTI	0.131618	0.198745
P87	LRTI	-0.437599	-0.190337
P88	LRTI	-0.156818	0.369431
P89	IPC	0.246701	-0.139669
P90	LRTI	-0.128467	0.364694
P91	CTRL	0.186568	-0.00672555
P92	IPC	0.130643	0.071791
P93	CTRL	0.0607294	0.100957
P94	IPC	0.287584	-0.171378
P95	LRTI	0.104362	0.0817065
P96	CTRL	0.188495	-0.027228
P97	CTRL	0.250841	-0.132209
P98	IPC	0.140602	0.207894
P99	IPC	0.123174	0.221717
P100	CTRL	0.201675	-0.0640794
P101	CTRL	0.115466	0.0918986
P102	LRTI	-0.474531	0.0862998
P103	LRTI	-0.149527	0.108229
P104	LRTI	-0.401833	-0.205648
P105	LRTI	0.119669	0.080641
P106	IPC	0.294364	-0.134005
P107	CTRL	0.113143	0.0881729
P108	LRTI	0.0969775	0.00953436
P109	LRTI	0.0827513	0.0818715
P110	CTRL	0.117777	0.0807389
P111	IPC	0.292295	-0.232554
P112	CTRL	0.261386	-0.107803
P113	LRTI	0.214255	-0.2818
P114	CTRL	0.156146	0.0781261
P115	IPC	0.282325	-0.164594
P116	LRTI	-0.439976	0.163838
P117	CTRL	0.1993	-0.00697905
P118	LRTI	-0.21659	-0.130855
P119	LRTI	-0.403417	0.0397272
P120	LRTI	-0.503239	-0.253879
P121	LRTI	0.0959894	0.123686
P122	LRTI	0.0782009	0.213613
P123	LRTI	-0.356125	-0.218962
P124	LRTI	-0.383208	0.151255
P125	LRTI	-0.489815	-0.226775
P126	LRTI	-0.516842	0.00269204
P127	LRTI	-0.37279	-0.214176
P128	LRTI	-0.165481	-0.0654882
P129	LRTI	-0.440906	0.0465471
P130	LRTI	-0.0475685	0.399851
P131	LRTI	-0.3183	0.103248
P132	LRTI	-0.402484	-0.157717
P133	LRTI	-0.00173029	0.312845
P134	LRTI	-0.356478	0.124084
P135	LRTI	-0.510882	-0.0214136
P136	LRTI	-0.309749	-0.268035
P137	LRTI	-0.449327	0.152231
P138	LRTI	-0.299229	-0.189888
P139	LRTI	-0.442333	-0.201125
P140	IPC	-0.497368	-0.23507
P141	LRTI	0.109969	0.0779195
P142	CTRL	0.238758	-0.162876
P143	IPC	0.0745748	0.0951597
P144	IPC	0.128586	-0.0865515
P145	IPC	0.318095	-0.234566
P146	CTRL	0.146446	0.0958084
P147	LRTI	0.0193257	0.00310515
P148	LRTI	0.135421	0.263259
P149	IPC	0.256559	-0.0707151
P150	CTRL	0.119874	0.0694048
P151	LRTI	0.110493	0.0690834
P152	LRTI	0.153587	0.169643
P153	LRTI	-0.426235	-0.178049
P154	LRTI	0.133692	0.189852
P155	LRTI	0.299455	-0.199179
P156	CTRL	0.127299	0.127779
P157	LRTI	0.131384	0.0513374
P158	LRTI	-0.479852	-0.0638201
P159	LRTI	0.129198	0.0900698
P160	LRTI	0.114044	0.104193
P161	LRTI	0.131237	0.245063
P162	LRTI	-0.374715	-0.208397
P163	LRTI	-0.339495	-0.224372
P164	LRTI	0.145897	0.23057
P165	LRTI	0.209008	0.0268428
P166	LRTI	-0.313251	-0.145433
P167	LRTI	0.223072	-0.142282
P168	CTRL	0.13499	0.12147
P169	LRTI	-0.357059	0.199388
P170	LRTI	-0.395166	-0.191575
P171	LRTI	-0.296059	-0.0753323
P172	CTRL	0.306116	-0.225393
P173	LRTI	-0.0180754	-0.020205
P174	LRTI	-0.393286	0.0172737
P175	LRTI	-0.494871	-0.0353827
P176	LRTI	-0.369212	0.0947931
P177	LRTI	-0.300782	-0.0384491
P178	LRTI	-0.269539	0.175687
P179	LRTI	-0.0102815	0.474706
P180	LRTI	0.137255	0.26708
P181	LRTI	0.103023	0.0728455
P182	IPC	0.298491	-0.18638
P183	IPC	0.346826	-0.253069
P184	IPC	0.0741564	0.130224
P185	IPC	0.166301	0.00941833
P186	IPC	0.297012	-0.193656
P187	IPC	0.248291	-0.0717815
P188	LRTI	0.1685	-0.20268
P189	LRTI	0.0518041	0.114754
P190	CTRL	0.27375	-0.163988
P191	IPC	0.12937	0.0213214
P192	IPC	0.0445251	0.258253
P193	CTRL	0.115191	0.122789
P194	LRTI	0.135669	0.183354
P195	LRTI	0.326807	-0.213379
P196	CTRL	0.131822	-1.04668e-05
P197	LRTI	0.13708	0.161109
P198	IPC	0.0928354	-0.052112
P199	LRTI	0.0328134	0.124749
P200	LRTI	0.104362	0.0817073
P201	CTRL	0.114961	0.069571
P202	CTRL	0.228392	-0.0636101
P203	CTRL	0.125098	0.0684691
P204	IPC	0.14495	0.234643
P205	IPC	-0.296579	-0.256259
P206	IPC	0.290108	-0.179286
P207	LRTI	0.26649	-0.0811549
P208	LRTI	0.246891	-0.147296
P209	LRTI	-0.246606	-0.129267
P210	IPC	0.120389	0.0749418
P211	CTRL	0.296703	-0.160656
P212	IPC	0.117695	0.0671926
P213	IPC	0.118224	0.0760849
P214	IPC	0.253542	-0.087144
P215	IPC	0.188535	-0.0138182
P216	IPC	0.0929935	0.137644
P217	CTRL	0.326185	-0.218473
P218	CTRL	0.145846	0.00718223
P219	IPC	0.323771	-0.186069
P220	LRTI	-0.433753	-0.218349
P221	LRTI	-0.501855	-0.211888
P222	LRTI	-0.0752078	0.405295
P223	LRTI	-0.065037	0.034787
P224	LRTI	-0.0544694	0.376827
P225	LRTI	-0.0426428	0.3428
P226	LRTI	-0.000519896	0.241789
P227	LRTI	-0.23514	0.0201727
P228	LRTI	-0.0181656	0.350206
P229	LRTI	0.0948951	0.0902989
P230	LRTI	0.110082	0.0977058
P231	LRTI	0.137873	0.200388
P232	LRTI	0.0997744	0.0781075
P233	LRTI	0.223256	0.0758218
P234	LRTI	0.246111	-0.152149
P235	LRTI	0.12861	0.197831
P236	LRTI	0.00939563	0.140441
P237	LRTI	-0.034491	-0.134141
P238	LRTI	-0.370282	-0.251566
P239	LRTI	0.00586229	0.0722484
P240	LRTI	-0.467638	-0.204047
P241	LRTI	-0.0819845	0.346189
P242	LRTI	-0.311601	-0.248411
P243	LRTI	-0.452126	-0.184426
P244	LRTI	-0.0835215	-0.226525
P245	LRTI	0.0631985	-0.141304
P246	LRTI	0.190226	-0.0104694
P247	LRTI	0.218243	-0.0651709
P248	LRTI	0.111901	0.100913
P249	LRTI	0.134465	0.249143
P250	LRTI	0.065045	0.141415
P251	LRTI	-0.343749	0.104832
P252	LRTI	-0.169246	0.163917
P253	LRTI	-0.456508	-0.219643
P254	LRTI	-0.44914	-0.0742289
P255	LRTI	0.034456	0.141104
P256	CTRL	0.36087	-0.274286
P257	IPC	0.308302	-0.211966
P258	LRTI	-0.0111416	0.454088
P259	LRTI	0.27196	-0.102231
P260	CTRL	0.277681	-0.181904
P261	IPC	0.197411	-0.134341
P262	LRTI	-0.436263	-0.102531
P263	LRTI	0.112545	0.0862968
P264	LRTI	0.134379	0.222624
P265	CTRL	0.300796	-0.198225
P266	IPC	-0.0154397	0.261334
P267	LRTI	0.149704	-0.0213729
P268	CTRL	0.210245	-0.0197061
P269	IPC	0.229024	-0.104424
P270	LRTI	-0.298091	-0.00934999
P271	LRTI	-0.354376	-0.0645529
P272	IPC	0.247347	-0.175584
P273	IPC	0.131995	0.0641207
P274	LRTI	0.255803	-0.141698
P275	LRTI	0.0419271	0.246908
P276	LRTI	-0.327222	0.0832269
P277	IPC	0.302667	-0.205908
P278	IPC	0.270351	-0.203051
P279	IPC	0.0985436	0.112968
P280	CTRL	0.253463	-0.135403
P281	LRTI	-0.0669403	-0.0718102
P282	LRTI	-0.464882	-0.178157
P283	IPC	0.251762	-0.14914
P284	IPC	0.0893166	-0.108789
P285	IPC	0.000539869	0.327232
P286	CTRL	0.136802	0.0370875
P287	IPC	0.117837	0.0876807
P288	LRTI	0.0680606	0.139919
P289	IPC	0.0327778	0.0406212
P290	LRTI	0.0579337	0.0687125
P291	LRTI	0.328473	-0.241168
P292	IPC	0.301643	-0.211134
P293	LRTI	-0.227217	-0.210046
P294	IPC	0.106711	0.252773
P295	CTRL	-0.0101207	0.0583212
P296	LRTI	-0.514293	-0.0388791
P297	IPC	-0.0254019	-0.129848
P298	LRTI	-0.169308	-0.0444663
P299	CTRL	0.320191	-0.225875
P300	LRTI	-0.360927	0.184605
P301	CTRL	0.339684	-0.233993
P302	LRTI	0.0329273	0.216493
P303	CTRL	0.141102	0.0374618
P304	LRTI	0.332922	-0.19367
P305	IPC	0.188804	-0.0691499
P306	IPC	0.198006	-0.0285875
P307	CTRL	0.0498228	0.17783
P308	IPC	0.125906	0.0949794
P309	CTRL	0.0988762	0.0867677
P310	LRTI	0.201427	-0.193242
P311	CTRL	0.0481471	0.0703572
P312	CTRL	0.122098	0.0709396
P313	LRTI	0.180665	0.00155866
P314	LRTI	-0.229397	0.0924116
P315	LRTI	-0.0464852	0.293067
P316	CTRL	0.205185	-0.0435649
P317	LRTI	0.3169	-0.163729
P318	CTRL	0.109359	0.0684299
P319	CTRL	0.120916	0.0831304
P320	CTRL	0.0597692	0.192598
P321	LRTI	0.154758	-0.0674318
P322	LRTI	0.121911	0.0599231
P323	IPC	0.260535	-0.0824881
P324	LRTI	0.234433	-0.116552
P325	IPC	0.216064	-0.0562071
P326	CTRL	0.33628	-0.231923

## Sheet: fig2d
Patient	group	log(sum(RPM))
P2	LRTI	3.25235
P3	LRTI	4.79584
P4	LRTI	2.41084
P5	LRTI	1.80355
P6	LRTI	2.57152
P7	LRTI	3.25107
P8	LRTI	2.07505
P9	LRTI	3.28233
P10	LRTI	1.05984
P11	LRTI	2.11166
P14	LRTI	1.8287
P15	LRTI	5.09197
P17	IPC	3.78269
P18	CTRL	1.16422
P19	CTRL	2.84008
P22	IPC	3.36356
P23	LRTI	3.88822
P25	CTRL	3.53004
P26	IPC	2.01876
P27	LRTI	1.22209
P28	IPC	4.40706
P29	LRTI	2.03741
P30	LRTI	1.93345
P33	LRTI	0.291865
P34	LRTI	1.53712
P35	IPC	2.17399
P36	LRTI	3.02678
P37	LRTI	1.8298
P38	LRTI	0.908789
P39	LRTI	3.12806
P40	LRTI	3.74811
P41	LRTI	0.825824
P42	LRTI	1.81483
P43	IPC	4.14938
P44	LRTI	1.59153
P45	LRTI	3.62401
P46	LRTI	3.21748
P48	IPC	3.57842
P49	LRTI	0.903002
P50	LRTI	2.79154
P51	LRTI	1.15091
P52	LRTI	3.14653
P53	IPC	3.52797
P54	LRTI	5.19298
P55	LRTI	3.41431
P56	LRTI	1.69397
P57	LRTI	1.373
P58	LRTI	1.89628
P59	LRTI	0.729947
P60	LRTI	4.60333
P62	IPC	3.22293
P63	LRTI	0.938625
P65	LRTI	1.19808
P66	LRTI	5.5519
P67	LRTI	1.70919
P71	LRTI	2.6959
P73	LRTI	2.09582
P74	IPC	1.06576
P75	LRTI	2.03743
P76	LRTI	2.54505
P77	LRTI	4.3076
P78	LRTI	1.6706
P79	IPC	4.31046
P80	IPC	3.60324
P82	CTRL	3.25921
P88	LRTI	4.31246
P89	IPC	2.21304
P90	LRTI	2.51403
P91	CTRL	2.10311
P92	IPC	4.23474
P93	CTRL	0.598878
P95	LRTI	3.80205
P96	CTRL	2.168
P97	CTRL	2.73516
P100	CTRL	2.00709
P101	CTRL	1.87452
P102	LRTI	1.72744
P103	LRTI	1.96232
P104	LRTI	2.10384
P105	LRTI	3.1402
P106	IPC	3.8572
P107	CTRL	2.41135
P108	LRTI	2.52101
P110	CTRL	2.74065
P111	IPC	2.80179
P112	CTRL	3.47255
P113	LRTI	4.6367
P114	CTRL	0.946739
P115	IPC	2.65173
P116	LRTI	2.86359
P117	CTRL	2.05036
P119	LRTI	0.885722
P122	LRTI	1.17053
P123	LRTI	3.28375
P124	LRTI	3.93106
P126	LRTI	1.4812
P127	LRTI	4.01357
P129	LRTI	1.4986
P130	LRTI	2.53302
P131	LRTI	0.815492
P132	LRTI	1.21079
P133	LRTI	1.62109
P134	LRTI	1.73608
P135	LRTI	0.558806
P137	LRTI	2.78625
P139	LRTI	1.37013
P142	CTRL	2.19162
P144	IPC	4.16433
P145	IPC	4.76139
P146	CTRL	1.46263
P147	LRTI	1.57105
P150	CTRL	3.0031
P151	LRTI	3.13992
P155	LRTI	5.01353
P156	CTRL	0.274738
P157	LRTI	0.661266
P158	LRTI	0.762971
P160	LRTI	1.75467
P162	LRTI	2.71691
P163	LRTI	4.50872
P166	LRTI	1.32649
P167	LRTI	2.271
P168	CTRL	0.811406
P169	LRTI	4.31438
P172	CTRL	2.45886
P173	LRTI	1.3128
P174	LRTI	1.77767
P175	LRTI	0.51509
P176	LRTI	1.75121
P177	LRTI	2.67533
P178	LRTI	2.78438
P179	LRTI	1.5789
P181	LRTI	1.10105
P183	IPC	3.3135
P184	IPC	1.92058
P185	IPC	0.687891
P186	IPC	2.91767
P187	IPC	3.16563
P190	CTRL	2.94434
P191	IPC	4.32026
P192	IPC	1.57757
P193	CTRL	0.532904
P196	CTRL	1.58569
P197	LRTI	0.707773
P198	IPC	2.69902
P199	LRTI	4.56648
P200	LRTI	3.52128
P201	CTRL	3.44677
P202	CTRL	5.65279
P203	CTRL	2.2284
P206	IPC	5.08015
P208	LRTI	5.06506
P209	LRTI	1.7085
P210	IPC	4.61478
P211	CTRL	3.20179
P212	IPC	2.01185
P214	IPC	2.16379
P216	IPC	2.74324
P217	CTRL	3.93613
P218	CTRL	2.63941
P219	IPC	2.9108
P220	LRTI	1.32585
P221	LRTI	1.28414
P222	LRTI	2.12091
P223	LRTI	2.39122
P224	LRTI	2.23048
P225	LRTI	1.38455
P226	LRTI	1.28579
P227	LRTI	1.41451
P228	LRTI	0.626831
P230	LRTI	1.14318
P234	LRTI	2.66516
P236	LRTI	3.36532
P237	LRTI	3.24774
P238	LRTI	0.777905
P239	LRTI	0.894894
P241	LRTI	4.27732
P242	LRTI	1.5664
P243	LRTI	1.78713
P244	LRTI	1.47866
P247	LRTI	2.89499
P248	LRTI	2.8069
P251	LRTI	2.71378
P252	LRTI	1.52071
P256	CTRL	3.67505
P257	IPC	3.91726
P258	LRTI	2.94172
P259	LRTI	2.7791
P260	CTRL	2.15097
P261	IPC	1.74782
P262	LRTI	0.687739
P263	LRTI	3.70848
P265	CTRL	3.35899
P266	IPC	2.23715
P267	LRTI	3.66904
P268	CTRL	5.69156
P269	IPC	3.7026
P270	LRTI	3.91675
P271	LRTI	2.70421
P275	LRTI	4.78512
P276	LRTI	4.1378
P277	IPC	5.15348
P278	IPC	2.14767
P280	CTRL	2.25461
P281	LRTI	4.01713
P282	LRTI	2.14427
P283	IPC	2.54875
P284	IPC	4.44523
P285	IPC	0.541586
P286	CTRL	2.22049
P287	IPC	4.4605
P288	LRTI	2.41627
P289	IPC	4.24742
P290	LRTI	2.44275
P291	LRTI	3.91381
P293	LRTI	1.71318
P295	CTRL	0.636442
P296	LRTI	0.418304
P298	LRTI	2.41957
P299	CTRL	3.96285
P300	LRTI	3.15568
P301	CTRL	3.74319
P302	LRTI	4.1836
P303	CTRL	1.1332
P305	IPC	2.84888
P307	CTRL	0.344824
P308	IPC	1.11662
P309	CTRL	0.950318
P310	LRTI	2.84634
P311	CTRL	1.33642
P312	CTRL	0.899911
P313	LRTI	2.29186
P314	LRTI	3.20941
P315	LRTI	2.07792
P316	CTRL	2.47256
P318	CTRL	1.20491
P319	CTRL	0.494038
P320	CTRL	0.688882
P321	LRTI	2.98155
P324	LRTI	4.17821
P326	CTRL	3.17677

## Sheet: fig2e
Patient	group	log(sum(RPM))
P1	LRTI	3.73132
P2	LRTI	3.21987
P3	LRTI	2.4946
P4	LRTI	1.97218
P5	LRTI	2.13029
P6	LRTI	2.47423
P7	LRTI	1.37873
P8	LRTI	3.71363
P9	LRTI	2.19658
P10	LRTI	3.23913
P12	LRTI	1.34777
P13	LRTI	0.483217
P14	LRTI	1.69581
P16	LRTI	3.91783
P20	IPC	1.74033
P21	LRTI	1.31807
P22	IPC	2.95405
P23	LRTI	2.34222
P24	LRTI	2.08536
P29	LRTI	2.93608
P30	LRTI	1.97173
P31	LRTI	0.250115
P32	LRTI	2.91249
P33	LRTI	2.77752
P34	LRTI	2.99712
P35	IPC	3.04548
P36	LRTI	2.37612
P37	LRTI	3.13071
P38	LRTI	3.03754
P39	LRTI	3.24602
P40	LRTI	1.26329
P41	LRTI	3.7849
P42	LRTI	3.61671
P43	IPC	0.372529
P44	LRTI	0.640218
P45	LRTI	2.93653
P46	LRTI	2.39175
P47	LRTI	1.24915
P50	LRTI	2.26926
P53	IPC	1.87077
P55	LRTI	3.33701
P57	LRTI	1.02058
P58	LRTI	2.01602
P59	LRTI	3.35414
P60	LRTI	1.87755
P61	LRTI	0.610698
P62	IPC	0.0799868
P63	LRTI	3.17934
P64	IPC	1.52588
P68	IPC	0.333658
P69	LRTI	3.4012
P70	LRTI	2.43174
P71	LRTI	2.47175
P72	LRTI	2.09719
P73	LRTI	1.60739
P77	LRTI	1.26601
P78	LRTI	0.937114
P81	LRTI	2.32918
P82	CTRL	0.597808
P83	IPC	1.51454
P84	LRTI	3.6236
P85	LRTI	0.759103
P86	LRTI	2.45938
P87	LRTI	2.39297
P89	IPC	0.310691
P90	LRTI	1.3595
P91	CTRL	0.0204089
P94	IPC	0.0169621
P98	IPC	4.39453
P99	IPC	4.22272
P102	LRTI	2.81811
P103	LRTI	2.51555
P104	LRTI	3.00072
P107	CTRL	0.0164931
P109	LRTI	1.86267
P110	CTRL	0.00840461
P112	CTRL	0.033966
P113	LRTI	3.38242
P114	CTRL	0.0129854
P116	LRTI	1.89077
P118	LRTI	2.22316
P119	LRTI	2.04455
P120	LRTI	3.78906
P121	LRTI	2.7753
P123	LRTI	2.84389
P124	LRTI	2.26151
P125	LRTI	2.99141
P126	LRTI	3.46916
P127	LRTI	3.53957
P128	LRTI	1.92511
P129	LRTI	2.95272
P130	LRTI	0.322096
P131	LRTI	2.59532
P132	LRTI	2.07119
P133	LRTI	2.98153
P134	LRTI	1.71502
P135	LRTI	2.73812
P136	LRTI	3.18946
P137	LRTI	2.18491
P138	LRTI	3.64292
P139	LRTI	4.19988
P140	IPC	3.19365
P141	LRTI	1.81624
P143	IPC	0.819634
P144	IPC	1.40869
P146	CTRL	0.0213494
P147	LRTI	1.28454
P148	LRTI	3.61489
P149	IPC	0.399038
P150	CTRL	0.706927
P151	LRTI	0.176519
P152	LRTI	3.35444
P153	LRTI	2.11516
P154	LRTI	2.97135
P157	LRTI	1.4055
P158	LRTI	3.32179
P159	LRTI	1.73051
P160	LRTI	0.143172
P161	LRTI	3.50787
P162	LRTI	2.87414
P163	LRTI	3.21194
P164	LRTI	4.2558
P165	LRTI	0.904411
P166	LRTI	2.60549
P167	LRTI	1.05536
P169	LRTI	1.89855
P170	LRTI	1.99087
P171	LRTI	1.38841
P174	LRTI	2.77948
P175	LRTI	2.78107
P176	LRTI	1.88985
P177	LRTI	2.1807
P178	LRTI	1.47785
P179	LRTI	2.97327
P180	LRTI	4.28187
P181	LRTI	0.105916
P182	IPC	0.545442
P183	IPC	1.23406
P185	IPC	2.85843
P187	IPC	1.87322
P188	LRTI	1.99959
P189	LRTI	1.34166
P191	IPC	3.47832
P194	LRTI	2.42815
P195	LRTI	1.44389
P197	LRTI	2.40524
P198	IPC	1.81624
P204	IPC	4.03366
P205	IPC	2.88406
P207	LRTI	0.205499
P208	LRTI	2.26142
P209	LRTI	3.81083
P211	CTRL	0.00799827
P212	IPC	0.992982
P213	IPC	2.54858
P215	IPC	2.49056
P217	CTRL	0.00575311
P218	CTRL	0.0182066
P220	LRTI	3.60445
P221	LRTI	3.28787
P224	LRTI	3.82476
P225	LRTI	3.49604
P226	LRTI	3.10464
P227	LRTI	2.77607
P229	LRTI	3.56188
P230	LRTI	2.29677
P231	LRTI	2.62176
P232	LRTI	0.033623
P233	LRTI	2.74579
P235	LRTI	3.62818
P236	LRTI	2.33259
P237	LRTI	3.08131
P238	LRTI	3.2758
P239	LRTI	2.33093
P240	LRTI	2.33898
P241	LRTI	1.01919
P242	LRTI	3.61498
P243	LRTI	2.55642
P244	LRTI	1.12155
P245	LRTI	1.84713
P246	LRTI	0.75478
P247	LRTI	1.81345
P248	LRTI	4.03743
P249	LRTI	4.50959
P250	LRTI	3.06289
P251	LRTI	1.59151
P252	LRTI	1.00307
P253	LRTI	3.6644
P254	LRTI	3.68392
P255	LRTI	2.8148
P258	LRTI	1.9116
P259	LRTI	3.96081
P260	CTRL	0.00994441
P261	IPC	0.123676
P262	LRTI	3.4049
P264	LRTI	4.94465
P267	LRTI	0.0730935
P270	LRTI	3.7297
P271	LRTI	1.81759
P272	IPC	0.301596
P273	IPC	0.987995
P274	LRTI	2.0575
P275	LRTI	0.0108782
P276	LRTI	2.79817
P280	CTRL	0.00575269
P281	LRTI	3.29388
P282	LRTI	2.46741
P283	IPC	1.08436
P287	IPC	3.0684
P288	LRTI	3.3028
P291	LRTI	2.64944
P292	IPC	1.50755
P293	LRTI	2.59556
P294	IPC	2.48654
P295	CTRL	0.0207109
P296	LRTI	3.27783
P297	IPC	1.74581
P298	LRTI	2.16781
P300	LRTI	0.758383
P302	LRTI	1.5234
P304	LRTI	2.86222
P305	IPC	0.782863
P306	IPC	1.64048
P308	IPC	2.92682
P309	CTRL	0.0144542
P313	LRTI	1.67966
P314	LRTI	0.487735
P315	LRTI	1.01194
P316	CTRL	0.57765
P317	LRTI	1.07018
P322	LRTI	2.19635
P323	IPC	1.95785
P324	LRTI	0.616745
P325	IPC	1.38557
P326	CTRL	0.00833604

## Sheet: fig2f
taxa	logFC	pval	padj	neg_log10_padj	sig
Schaalia odontolytica	-1.21956	0.00357206	0.0388462	1.41065	Increased in IPC
Veillonella dispar	-0.582633	0.129301	0.356851	0.447513	Not significant
Veillonella parvula	-0.221171	0.533479	0.682539	0.165872	Not significant
Streptococcus thermophilus	-0.519	0.145662	0.372724	0.428612	Not significant
Staphylococcus epidermidis	-0.382018	0.348733	0.572449	0.242264	Not significant
Prevotella oris	-0.26796	0.488045	0.655408	0.183488	Not significant
Prevotella melaninogenica	-1.04971	0.0315795	0.144601	0.839829	Not significant
Eikenella corrodens	-0.848926	0.0112048	0.0812352	1.09026	Not significant
Neisseria sp.	-1.19098	0.00491758	0.042783	1.36873	Increased in IPC
Neisseria gonorrhoeae	-0.402893	0.162021	0.380968	0.419111	Not significant
uncultured bacterium	-0.273652	0.548408	0.69147	0.160226	Not significant
Pneumocystis jirovecii	0.144451	0.680997	0.788155	0.103388	Not significant
Streptococcus pyogenes	-0.403849	0.171231	0.392028	0.406683	Not significant
Streptococcus pneumoniae	-1.16866	0.01959	0.119863	0.921315	Not significant
Aggregatibacter segnis	-0.256896	0.449259	0.638136	0.195087	Not significant
Aggregatibacter aphrophilus	-0.264291	0.367799	0.581618	0.235362	Not significant
Aggregatibacter actinomycetemcomitans	-0.00572767	0.982529	0.998506	0.000649308	Not significant
Avibacterium paragallinarum	0.269058	0.284705	0.495387	0.305056	Not significant
Mannheimia haemolytica	-0.257256	0.454763	0.638136	0.195087	Not significant
Pasteurella multocida	0.137973	0.690892	0.788155	0.103388	Not significant
Haemophilus influenzae	-0.533214	0.387897	0.592054	0.227639	Not significant
Haemophilus haemolyticus	-1.44693	0.00340624	0.0388462	1.41065	Increased in IPC
Actinobacillus pleuropneumoniae	0.212182	0.429282	0.622459	0.205889	Not significant
Moraxella catarrhalis	-0.0104321	0.987948	0.998506	0.000649308	Not significant
Enterocloster bolteae	0.0514847	0.851897	0.915001	0.0385786	Not significant
Parabacteroides distasonis	0.162062	0.574964	0.709861	0.148826	Not significant
Tannerella sp. oral taxon HOT-286	-0.104375	0.732089	0.816561	0.0880113	Not significant
Tannerella forsythia	-0.278335	0.322593	0.550306	0.259396	Not significant
Lautropia mirabilis	-0.689846	0.0810327	0.245663	0.609661	Not significant
Quercus lobata	-0.296346	0.412714	0.608579	0.215683	Not significant
Staphylococcus aureus	-0.489145	0.265684	0.481552	0.317357	Not significant
Prevotella denticola	0.100571	0.746408	0.821994	0.0851314	Not significant
Porphyromonas gingivalis	-1.61602	0.000381325	0.0137073	1.86305	Increased in IPC
Bacteroides ovatus	0.0867505	0.758567	0.824942	0.0835767	Not significant
Campylobacter concisus	-0.926524	0.020666	0.119863	0.921315	Not significant
Parvimonas micra	-0.19842	0.497206	0.655408	0.183488	Not significant
Granulicatella adiacens	-0.506875	0.157659	0.380968	0.419111	Not significant
Rothia mucilaginosa	-1.56947	0.00120479	0.0174694	1.75772	Increased in IPC
Leptotrichia sp. oral taxon 212	-0.420208	0.196073	0.426458	0.370123	Not significant
Leptotrichia wadei	-0.337649	0.334606	0.559821	0.251951	Not significant
Veillonella nakazawae	-0.308974	0.4106	0.608579	0.215683	Not significant
Veillonella atypica	-0.638706	0.128656	0.356851	0.447513	Not significant
Saccharomyces cerevisiae	0.20873	0.479345	0.655408	0.183488	Not significant
Streptococcus mitis	-2.03857	0.000472664	0.0137073	1.86305	Increased in IPC
Streptococcus parasanguinis	-0.459637	0.188879	0.421347	0.375361	Not significant
Capnocytophaga gingivalis	-0.906339	0.0272188	0.131557	0.880885	Not significant
Fusobacterium pseudoperiodonticum	-0.818586	0.024421	0.124978	0.903166	Not significant
Prevotella nanceiensis	-0.321969	0.246233	0.476051	0.322346	Not significant
Prevotella ruminicola	0.22489	0.372041	0.581618	0.235362	Not significant
Neisseria flavescens	-0.216201	0.523872	0.680252	0.16733	Not significant
Campylobacter showae	-0.214022	0.490848	0.655408	0.183488	Not significant
Gemella sanguinis	-0.480286	0.0818875	0.245663	0.609661	Not significant
Streptococcus salivarius	-1.03715	0.00791111	0.0625697	1.20364	Not significant
Capnocytophaga leadbetteri	-0.525849	0.160262	0.380968	0.419111	Not significant
Capnocytophaga sputigena	-0.669207	0.073153	0.235715	0.627612	Not significant
Fusobacterium nucleatum	-0.47386	0.263867	0.481552	0.317357	Not significant
Prevotella sp. oral taxon 299	-1.40252	0.000641449	0.0139515	1.85538	Increased in IPC
Prevotella scopos	-0.160914	0.57995	0.709861	0.148826	Not significant
Prevotella intermedia	-0.455669	0.231768	0.458269	0.338879	Not significant
Porphyromonas crevioricanis	-0.758943	0.0145595	0.0974366	1.01128	Not significant
Bacteroides fragilis	-0.539451	0.135357	0.356851	0.447513	Not significant
Haemophilus parainfluenzae	-0.845844	0.0617064	0.228491	0.64113	Not significant
Neisseria subflava	-1.0079	0.0431252	0.170541	0.768172	Not significant
Gemella morbillorum	-0.861372	0.00485987	0.042783	1.36873	Increased in IPC
Neisseria elongata	-0.384288	0.259639	0.481552	0.317357	Not significant
Moraxella nonliquefaciens	-0.46584	0.219784	0.44468	0.351952	Not significant
Gemella haemolysans	-1.40997	0.000976568	0.0169923	1.76975	Increased in IPC
Haemophilus parahaemolyticus	-0.727718	0.0693962	0.23221	0.634119	Not significant
Streptobacillus moniliformis	-0.646688	0.0642562	0.228491	0.64113	Not significant
Aureobasidium pullulans	0.0197443	0.950234	0.996028	0.00172835	Not significant
Selenomonas sputigena	0.00333887	0.990436	0.998506	0.000649308	Not significant
Prevotella jejuni	-0.469721	0.205922	0.426552	0.370028	Not significant
Prevotella fusca	-0.253603	0.374375	0.581618	0.235362	Not significant
Moraxella bovoculi	-0.0479592	0.885379	0.939366	0.0271653	Not significant
Streptococcus pseudopneumoniae	-0.446991	0.134167	0.356851	0.447513	Not significant
Neisseria mucosa	-1.12213	0.0237276	0.124978	0.903166	Not significant
Neisseria lactamica	-0.475791	0.202394	0.426552	0.370028	Not significant
Neisseria cinerea	-0.888049	0.0410458	0.170047	0.769431	Not significant
Prevotella copri	0.000584272	0.998506	0.998506	0.000649308	Not significant
Rhinovirus C	-0.309777	0.587471	0.709861	0.148826	Not significant
Human rhinovirus sp.	0.160499	0.645869	0.759332	0.119568	Not significant
Rhinovirus A	0.265059	0.611819	0.729154	0.137181	Not significant
Streptococcus oralis	-0.878133	0.0387543	0.168581	0.773191	Not significant
Fusobacterium hwasookii	-0.362008	0.273491	0.485585	0.313734	Not significant
Streptococcus agalactiae	-0.696946	0.0656584	0.228491	0.64113	Not significant
Capnocytophaga ochracea	-0.10272	0.697563	0.788155	0.103388	Not significant
RSV	3.46024	4.9601e-09	4.31528e-07	6.36499	Increased in LRTI

## Sheet: fig2g
Patient	group	pathogen proportion
P1	LRTI	0.950272
P2	LRTI	0.963473
P3	LRTI	0.670741
P4	LRTI	0.0341197
P5	LRTI	0.376301
P6	LRTI	0.2705
P7	LRTI	0.969116
P8	LRTI	0.994615
P9	LRTI	0.0975039
P10	LRTI	0.802814
P11	LRTI	0.737832
P12	LRTI	0.0733161
P13	LRTI	0.00380574
P14	LRTI	0.0683798
P15	LRTI	0.431091
P16	LRTI	0.338723
P17	IPC	0.0557839
P20	IPC	0.0205366
P21	LRTI	0.0143078
P22	IPC	0.930155
P23	LRTI	0.613968
P24	LRTI	0.4005
P26	IPC	0.737704
P27	LRTI	0.0189415
P28	IPC	0.718831
P29	LRTI	0.891897
P30	LRTI	0.732141
P31	LRTI	0.000151679
P32	LRTI	0.792893
P33	LRTI	0.708127
P34	LRTI	0.502841
P35	IPC	0.77489
P36	LRTI	0.833182
P37	LRTI	0.971988
P38	LRTI	0.973373
P39	LRTI	0.927699
P40	LRTI	0.930598
P41	LRTI	0.980769
P42	LRTI	0.587748
P43	IPC	0.949517
P44	LRTI	0.273563
P45	LRTI	0.946333
P46	LRTI	0.798039
P47	LRTI	0.142929
P48	IPC	0.304967
P49	LRTI	0.0635209
P50	LRTI	0.948023
P51	LRTI	0.0130064
P52	LRTI	0.829704
P53	IPC	0.918637
P54	LRTI	0.357978
P55	LRTI	0.972001
P56	LRTI	0.387892
P57	LRTI	0.198392
P58	LRTI	0.719414
P59	LRTI	0.942844
P60	LRTI	0.887497
P61	LRTI	0.0298973
P62	IPC	0.236589
P63	LRTI	0.832962
P64	IPC	0.148049
P65	LRTI	0.0411918
P66	LRTI	0.505321
P68	IPC	0.000671652
P69	LRTI	0.743048
P70	LRTI	0.427046
P71	LRTI	0.711863
P72	LRTI	0.258894
P73	LRTI	0.750807
P76	LRTI	0.863569
P77	LRTI	0.973988
P78	LRTI	0.136974
P79	IPC	0.137547
P81	LRTI	0.252917
P83	IPC	0.00596613
P84	LRTI	0.983394
P85	LRTI	0.00347419
P86	LRTI	0.551203
P87	LRTI	0.818161
P88	LRTI	0.987141
P89	IPC	0.118218
P90	LRTI	0.7053
P92	IPC	0.91432
P95	LRTI	0.995742
P98	IPC	0.990441
P99	IPC	0.994483
P102	LRTI	0.966059
P103	LRTI	0.9069
P104	LRTI	0.887543
P105	LRTI	0.629521
P106	IPC	0.220478
P108	LRTI	0.661692
P109	LRTI	0.100371
P111	IPC	0.251434
P113	LRTI	0.0478122
P116	LRTI	0.953184
P118	LRTI	0.0247884
P119	LRTI	0.691011
P120	LRTI	0.988473
P121	LRTI	0.953426
P122	LRTI	0.040617
P123	LRTI	0.986862
P124	LRTI	0.979808
P125	LRTI	0.946286
P126	LRTI	0.904087
P127	LRTI	0.960581
P128	LRTI	0.115953
P129	LRTI	0.954593
P130	LRTI	0.674238
P131	LRTI	0.796538
P132	LRTI	0.581556
P133	LRTI	0.941223
P134	LRTI	0.640745
P135	LRTI	0.950245
P136	LRTI	0.921746
P137	LRTI	0.951139
P138	LRTI	0.703107
P139	LRTI	0.961694
P140	IPC	0.917884
P141	LRTI	0.573484
P143	IPC	0.0103755
P144	IPC	0.906237
P145	IPC	0.616441
P147	LRTI	0.264727
P148	LRTI	0.96531
P149	IPC	0.00373619
P151	LRTI	0.736421
P152	LRTI	0.979993
P153	LRTI	0.840776
P154	LRTI	0.755755
P155	LRTI	0.0681514
P157	LRTI	0.259467
P158	LRTI	0.975865
P159	LRTI	0.0348769
P160	LRTI	0.174518
P161	LRTI	0.938016
P162	LRTI	0.885185
P163	LRTI	0.958575
P164	LRTI	0.996269
P165	LRTI	0.0459681
P166	LRTI	0.683913
P167	LRTI	0.0328853
P169	LRTI	0.994373
P170	LRTI	0.442911
P171	LRTI	0.0808681
P173	LRTI	0.433059
P174	LRTI	0.679851
P175	LRTI	0.912419
P176	LRTI	0.606143
P177	LRTI	0.436233
P178	LRTI	0.633055
P179	LRTI	0.805702
P180	LRTI	0.973991
P181	LRTI	0.320404
P182	IPC	6.98386e-05
P183	IPC	0.00465593
P184	IPC	0.0374745
P185	IPC	0.859909
P187	IPC	0.342705
P188	LRTI	0.0699532
P189	LRTI	0.236014
P191	IPC	0.895331
P192	IPC	0.246819
P194	LRTI	0.56673
P195	LRTI	0.0430957
P197	LRTI	0.446984
P198	IPC	0.0110713
P199	LRTI	0.805138
P200	LRTI	0.960421
P204	IPC	0.926738
P205	IPC	0.65167
P207	LRTI	0.003111
P208	LRTI	0.000385966
P209	LRTI	0.910548
P210	IPC	0.393277
P212	IPC	0.0456839
P213	IPC	0.0525781
P214	IPC	0.0359621
P215	IPC	0.0463741
P216	IPC	0.103825
P219	IPC	0.0886791
P220	LRTI	0.97597
P221	LRTI	0.988231
P222	LRTI	0.762367
P223	LRTI	0.926935
P224	LRTI	0.991291
P225	LRTI	0.992447
P226	LRTI	0.972906
P227	LRTI	0.87947
P228	LRTI	0.0959596
P229	LRTI	0.98029
P230	LRTI	0.90861
P231	LRTI	0.978021
P233	LRTI	0.646059
P234	LRTI	0.427732
P235	LRTI	0.927531
P236	LRTI	0.990213
P237	LRTI	0.883232
P238	LRTI	0.983152
P239	LRTI	0.914098
P240	LRTI	0.931987
P241	LRTI	0.987298
P242	LRTI	0.961272
P243	LRTI	0.955589
P244	LRTI	0.31227
P245	LRTI	0.0483811
P246	LRTI	0.0524017
P247	LRTI	0.266309
P248	LRTI	0.944075
P249	LRTI	0.994113
P250	LRTI	0.944631
P251	LRTI	0.939688
P252	LRTI	0.499562
P253	LRTI	0.987279
P254	LRTI	0.970769
P255	LRTI	0.930786
P257	IPC	0.627891
P258	LRTI	0.924733
P259	LRTI	0.938346
P261	IPC	0.00374202
P262	LRTI	0.980333
P263	LRTI	0.598537
P264	LRTI	0.986208
P266	IPC	0.490148
P267	LRTI	0.656891
P269	IPC	0.669124
P270	LRTI	0.961847
P271	LRTI	0.880228
P272	IPC	0.000151137
P273	IPC	0.00834152
P274	LRTI	0.010301
P275	LRTI	0.912186
P276	LRTI	0.976343
P277	IPC	0.0732724
P278	IPC	0.0396944
P281	LRTI	0.707636
P282	LRTI	0.714561
P283	IPC	0.0154425
P284	IPC	0.95714
P285	IPC	0.0110017
P287	IPC	0.941939
P288	LRTI	0.791089
P289	IPC	0.923805
P290	LRTI	0.138638
P291	LRTI	0.157444
P292	IPC	0.00637038
P293	LRTI	0.508506
P294	IPC	0.293172
P296	LRTI	0.92793
P297	IPC	0.0450745
P298	LRTI	0.457406
P300	LRTI	0.76827
P302	LRTI	0.89653
P304	LRTI	0.48299
P305	IPC	0.244774
P306	IPC	0.131563
P308	IPC	0.913356
P310	LRTI	0.324324
P313	LRTI	0.13129
P314	LRTI	0.963822
P315	LRTI	0.183473
P317	LRTI	0.00486277
P321	LRTI	0.605836
P322	LRTI	0.0258995
P323	IPC	0.015587
P324	LRTI	0.723999
P325	IPC	0.000822248

## Sheet: fig2h
HMW 1/HMW 2				HxuABC
Patient	group	HMW 1/HMW 2 sum(DPM)		Patient	group	HxuABC sum(DPM)
P3	LRTI	652.424		P3	LRTI	267.963
P7	LRTI	253.428		P7	LRTI	57.0088
P9	LRTI	8.60161		P9	LRTI	3.30514
P14	LRTI	1.02376		P15	LRTI	208.949
P15	LRTI	934.698		P30	LRTI	11.2637
P17	IPC	3.39101		P35	IPC	1.11585
P30	LRTI	45.599		P40	LRTI	156.246
P35	IPC	1.41253		P52	LRTI	3.91569
P37	LRTI	3.61169		P53	IPC	95.0431
P40	LRTI	479.021		P54	LRTI	456.247
P48	IPC	67.5922		P60	LRTI	391.127
P52	LRTI	145.682		P73	LRTI	168.159
P53	IPC	131.773		P77	LRTI	31.1481
P54	LRTI	2038.04		P88	LRTI	281.12
P58	LRTI	4.56755		P113	LRTI	3.16472
P60	LRTI	1185.2		P124	LRTI	175.124
P73	LRTI	195.636		P145	IPC	1.06342
P77	LRTI	289.762		P169	LRTI	169.982
P78	LRTI	7.76511		P174	LRTI	2.9622
P80	IPC	6.43029		P191	IPC	23.1125
P88	LRTI	3504.78		P192	IPC	27.1754
P90	LRTI	683.197		P237	LRTI	12.1761
P102	LRTI	7.22735		P241	LRTI	125.481
P113	LRTI	6.7939		P258	LRTI	11.336
P116	LRTI	248.798		P269	IPC	12.4747
P124	LRTI	1474.21		P270	LRTI	15.8779
P130	LRTI	398.87		P275	LRTI	520.065
P133	LRTI	3.99614		P276	LRTI	13.4905
P134	LRTI	190.471		P281	LRTI	14.8581
P137	LRTI	118.459		P298	LRTI	19.0578
P169	LRTI	1012.88		P300	LRTI	27.2298
P174	LRTI	0.6186		P302	LRTI	208.948
P176	LRTI	2.95124		P323	IPC	2.45777
P178	LRTI	3.92545
P182	IPC	14.035
P192	IPC	185.556
P224	LRTI	0.0754194
P237	LRTI	123.536
P241	LRTI	1351.37
P247	LRTI	17.6222
P216	IPC	5.37008
P251	LRTI	429.669
P258	LRTI	191.915
P269	IPC	389.137
P270	LRTI	68.176
P275	LRTI	1269.59
P276	LRTI	364.182
P277	IPC	6.29847
P281	LRTI	177.136
P300	LRTI	817.066
P302	LRTI	1443.6
P314	LRTI	1511.28
P325	IPC	5.89681
P199	LRTI	49.12

## Sheet: fig2i
feature	metadata	value	coef	stderr	pval	qval	N	N.not.zero
FAO.PWY..fatty.acid..beta..oxidation.I..generic.	group	LRTI	-0.198278	0.0531038	0.000229255	0.0343883	277	6
PWY.5136..fatty.acid..beta..oxidation.II..plant.peroxisome.	group	LRTI	-0.279688	0.0788787	0.000459918	0.0344938	277	5
PWY.4984..urea.cycle	group	LRTI	-0.102868	0.0319464	0.00143568	0.0358921	277	4
PWY.5138..fatty.acid..beta..oxidation.IV..unsaturated..even.number.	group	LRTI	-0.172869	0.0519527	0.000995977	0.0358921	277	5
PWY.5188..tetrapyrrole.biosynthesis.I..from.glutamate.	group	LRTI	-0.153897	0.0477717	0.00142852	0.0358921	277	6
PWY.8187..L.arginine.degradation.XIII..reductive.Stickland.reaction.	group	LRTI	-0.135518	0.0417827	0.00132695	0.0358921	277	4
CITRULBIO.PWY..L.citrulline.biosynthesis	group	LRTI	-0.16454	0.0521233	0.00177281	0.0379887	277	5

[truncated: 42 more sheets: fig3a, fig3b, fig3c, fig3d, fig3e, fig3f, fig3g, fig4a, fig4b, fig4c, fig4d, fig4e, fig4f, fig4g, fig4h, fig4i, fig5a, fig5b, fig5c, fig5d …]
